# Supplementary material
Source: publisher figshare collection journal article supplement (https://gsapubs.figshare.com/ndownloader/files/36444117)
Supplement: Supplementary file 1 [file 36444117]

## Sheet: Bronto ICP
Lab No.	Field No.	Sample Description	Al	Ca	Fe	K	Mg	P	S	Si	Ti	Ag	As	B	Ba	Be	Bi	Cd	Ce	Co	Cr	Cs	Cu	Dy	Er	Eu	Ga	Gd	Ge	Hf	Ho	In	La	Li	Lu	Mn	Mo	Nb	Nd	Ni	Pb	Pr	Rb	Sb	Sc	Se	Sm	Sn	Sr
			%	%	%	%	%	%	%	%	%	ppm	ppm	ppm	ppm	ppm	ppm	ppm	ppm	ppm	ppm	ppm	ppm	ppm	ppm	ppm	ppm	ppm	ppm	ppm	ppm	ppm	ppm	ppm	ppm	ppm	ppm	ppm	ppm	ppm	ppm	ppm	ppm	ppm	ppm	ppm	ppm	ppm	ppm
C-470610	BR1-6335.4	Shublik Brontosaurus core	3.16	5.34	4.7	0.94	0.54	0.07	0.7	29.7	0.29	<1	81	100	246	<5	<0.1	1.1	39.7	5.3	116	4	28	3.7	2.19	0.85	8.18	4.07	2	8	0.74	<0.2	23.2	25	0.37	26	63	7.6	22.9	73	10	6.24	60.1	3.2	7	<5	4.5	<1	248
C-470611	BR1-6339.3	Shublik Brontosaurus core	5.8	2.64	3.11	1.72	0.68	0.02	0.5	30.6	0.46	<1	51	161	448	<5	0.2	0.6	52.1	7.3	150	7.4	32	1.94	1.75	0.54	13.8	2.12	2	7	0.46	<0.2	28.9	45	0.38	39	35	11.9	20	60	11	6.02	111	1.5	11	<5	3	<1	207
C-470612	BR1-6347.4	Shublik Brontosaurus core	4.32	4.13	2.43	1.29	0.78	0.19	0.4	31.3	0.39	<1	55	126	434	<5	0.1	0.8	57.6	6.3	163	4.9	26	6.67	3.93	1.66	11.7	7.85	2	8	1.33	<0.2	39.7	36	0.58	41	17	10.3	38.5	65	11	10.2	77.6	1.4	9	<5	7.9	<1	243
C-470614	BR1-6354.5	Shublik Brontosaurus core	0.93	24.6	0.9	0.26	0.53	0.31	0.3	12.3	0.07	<1	7	30	294	<5	<0.1	0.4	28	1.4	65	0.6	9	5.95	3.28	1.47	2.77	7.16	<1	4	1.16	<0.2	28.1	11	0.4	<10	3	1.6	28.3	15	<5	7.21	11.4	<0.1	<5	16	6.6	<1	494
C-470615	BR1-6356.9	Shublik Brontosaurus core	3.31	13.1	3.3	1.03	0.61	3.65	2.8	20.6	0.27	<1	51	102	367	<5	0.1	1	78.8	4.1	224	3.3	25	17.7	10.6	4.19	9.25	20.4	2	7	3.55	<0.2	82.7	33	1.29	<10	33	7.2	78.8	74	13	20.3	54.6	1.8	14	<5	18	<1	829
C-470616	BR1-6369.4	Shublik Brontosaurus core	1.38	9.63	0.81	0.46	0.46	0.84	0.6	33.1	0.18	<1	9	53	192	<5	<0.1	0.4	71	2	85	1.1	14	9.62	5.69	2.36	3.62	11.1	1	11	1.98	<0.2	46.6	12	0.7	<10	8	4.9	46.2	33	<5	11.6	21.2	1.3	6	9	10.2	<1	364
C-470617	BR1-6410.3	Shublik Brontosaurus core	2.11	11.7	2.17	0.72	0.31	0.66	0.8	26.1	0.16	<1	31	67	450	<5	0.2	1.2	63.1	2.8	62	3.4	26	8.62	4.98	2.09	5.53	9.73	1	3	1.67	<0.2	39.4	16	0.57	40	7	4.3	36.8	39	8	9.32	38.3	0.1	8	<5	8.5	<1	449
C-470618	BR1-6437.8	Shublik Brontosaurus core	6.98	1.42	3.87	2.19	0.47	0.06	0.5	28.9	0.44	<1	20	176	982	<5	0.4	0.3	70.9	8.4	100	14.1	40	4.56	2.86	1.2	17.4	5.23	2	5	0.9	<0.2	37.9	43	0.4	141	4	12.2	29.6	36	22	8.45	133	0.7	14	<5	5.5	<1	323
C-470619	BR1-6449.5	Shublik Brontosaurus core	1.17	12.1	12.9	0.27	0.07	5.31	3.8	13	0.06	<1	280	38	155	<5	0.1	0.5	29.9	2.6	245	1.1	<5	4.74	2.88	1.03	3.24	5.22	<1	2	0.95	<0.2	20.8	10	0.36	10	24	1.4	18.7	35	22	4.72	12.7	8.9	<5	<5	4.3	2	463
[truncated: 13 more columns]

## Sheet: Surprise Ck ICP
Lab No.	Field No.	Al	Ca	Fe	K	Mg	P	S	Si	Ti	Ag	As	B	Ba	Be	Bi	Cd	Ce	Co	Cr	Cs	Cu	Dy	Er	Eu	Ga	Gd	Ge	Hf	Ho	In	La	Li	Lu	Mn	Mo	Nb	Nd	Ni	Pb	Pr	Rb	Sb	Sc	Se	Sm	Sn	Sr	Ta
		%	%	%	%	%	%	%	%	%	ppm	ppm	ppm	ppm	ppm	ppm	ppm	ppm	ppm	ppm	ppm	ppm	ppm	ppm	ppm	ppm	ppm	ppm	ppm	ppm	ppm	ppm	ppm	ppm	ppm	ppm	ppm	ppm	ppm	ppm	ppm	ppm	ppm	ppm	ppm	ppm	ppm	ppm	ppm
C-466994	13SC1-5	2.21	8.25	1.38	0.91	0.47	0.03	0.7	27.1	0.12	1	36	65	1250	<5	0.4	61	19	3.9	350	2.4	274	4.87	3.66	1.02	7.2	4.53	2	2	1.13	<0.2	22.5	16	0.63	172	70	2.7	18.4	164	9	4.62	36.9	37.2	10	42	3.9	<1	242	<0.5
C-466995	13SC1-6	3.77	0.67	1.86	1.34	0.51	0.04	0.3	38.3	0.18	<1	8	124	1730	<5	0.2	0.3	33.3	12.5	126	5.1	96	3.46	2.2	0.96	10	3.64	3	2	0.7	<0.2	18.1	39	0.34	112	4	3.8	17.3	114	9	4.39	66.1	1.5	12	<5	3.6	<1	77	<0.5
C-466997	13SC1-20	4.6	3.24	2.34	1.48	1.02	0.03	0.6	34.1	0.23	<1	9	137	1860	<5	0.2	0.4	45.4	20.3	129	5.8	124	3.77	2.39	1.08	12.1	4.11	2	2	0.78	<0.2	22.7	41	0.35	242	4	4.9	20.7	123	10	5.4	74.2	1.1	14	<5	4.3	2	158	<0.5
C-466998	13SC1-40	4.11	2.9	2.26	1.29	0.91	0.03	0.7	35.8	0.2	<1	<5	126	1800	<5	0.2	0.3	39.6	12.1	150	5.2	242	3.28	2.05	0.96	11	3.49	2	2	0.66	<0.2	19.9	36	0.31	198	4	3.7	17.6	94	8	4.77	67.4	0.9	13	<5	3.6	<1	137	<0.5
C-466999	13SC1-45	4.53	3.16	2.32	1.41	0.86	0.04	0.8	34.1	0.23	<1	6	146	2130	<5	0.3	0.3	42.7	13.9	189	5.7	224	3.79	2.35	1.16	12.8	4.17	2	2	0.76	<0.2	21.6	40	0.37	212	4	4.5	19.6	98	11	5.15	73.9	1.1	16	<5	4.1	3	144	<0.5
C-467000	13SC1-60	4.91	3.63	2.23	1.49	0.8	0.03	0.4	33.3	0.25	<1	<5	158	2210	<5	0.3	<0.2	50.7	12.1	107	6.4	29	3.74	2.42	1.12	12.9	4.05	2	2	0.81	<0.2	25.5	44	0.38	204	2	4.9	21.6	85	11	5.87	80.9	1.2	17	<5	4.2	<1	191	<0.5
C-467001	13SC1-65	3.68	2.74	1.97	1.12	0.75	0.03	0.5	34.9	0.19	<1	<5	116	1820	<5	0.3	0.2	37	10.9	111	4.5	118	3.4	2.06	0.97	10.4	3.55	2	2	0.69	<0.2	18.6	36	0.31	162	3	3.5	17	69	7	4.45	61.5	0.8	13	<5	3.4	2	131	<0.5
C-467002	13SC1-75	4.54	2.23	2.22	1.4	0.86	0.03	0.5	35.2	0.22	<1	<5	145	1980	<5	0.2	<0.2	42.4	8.8	113	5.7	45	3.31	2.09	1.06	12.2	3.62	2	2	0.68	<0.2	21.6	40	0.32	194	4	4.3	19.5	65	7	5.13	75.7	0.7	14	<5	3.8	5	120	<0.5
C-467003	13SC1-100	3.97	6.32	1.8	1.17	0.76	0.03	0.5	31.7	0.19	<1	5	115	2500	<5	0.2	0.4	43.3	23.2	108	4.5	156	3.62	2.26	1.13	10.7	3.87	2	2	0.74	<0.2	21.4	36	0.35	525	6	3.3	19.1	107	8	5.05	59.8	0.9	16	<5	3.8	<1	276	<0.5
C-467004	13SC1-110	3.88	3.07	1.95	1.24	0.89	0.03	0.4	35.2	0.2	<1	<5	126	1770	<5	0.2	0.4	36.6	8.7	119	4.8	98	2.86	1.74	0.92	10.3	3.07	2	2	0.58	<0.2	18	33	0.28	205	<2	3.8	16.4	63	5	4.26	64.8	0.6	12	<5	3.2	3	129	<0.5
C-467005	13SC1-150	2.4	15.1	4.04	0.74	3.05	0.03	0.4	17.6	0.12	<1	<5	79	2560	<5	0.2	<0.2	46.4	4.6	69	3	33	4.88	3.42	1.25	6.62	4.74	1	1	1.1	<0.2	24	21	0.56	1880	<2	1.8	20.2	35	<5	5.3	40.7	0.6	14	<5	4	6	346	<0.5
C-467006	13SC1-170	4.44	3.04	1.94	1.36	0.92	0.04	0.4	36.4	0.22	<1	<5	138	1940	<5	0.4	<0.2	40.5	6	91	5.5	65	2.9	1.88	0.94	11.4	3.2	2	2	0.59	<0.2	20.7	37	0.29	203	2	4.1	18.4	60	7	4.9	74.4	0.8	14	<5	3.5	3	134	<0.5
C-467008	13SC1-200	4.88	2.56	1.96	1.5	0.98	0.05	0.3	34.9	0.24	<1	<5	157	1960	<5	0.3	<0.2	46.4	10.7	107	6.4	69	3.71	2.27	1.14	13.3	4.06	2	2	0.78	<0.2	23.4	42	0.35	185	4	4.7	21	74	7	5.51	82.9	0.8	16	<5	4.4	4	122	<0.5
C-467009	13SC1-340-A	2.92	1.41	2	0.79	0.63	0.06	0.6	38.3	0.15	<1	<5	81	1670	<5	0.3	0.3	29.8	7	87	3.1	77	3.65	2.29	1.06	7.22	3.9	2	2	0.74	<0.2	18.1	39	0.37	121	2	2.1	16.9	49	7	4.36	41.9	0.8	11	5	3.4	3	84.5	<0.5
C-467010	13SC1-340-B	4.58	0.28	2.72	1.71	0.54	0.05	0.4	36.3	0.24	<1	14	161	1860	<5	0.4	<0.2	38.2	7.9	240	5.9	105	2.63	2.34	0.72	14.8	2.04	3	3	0.65	<0.2	23.3	38	0.45	86	5	4.4	16.7	84	12	4.72	84.7	2.3	13	15	2.6	1	86	<0.5
C-467011	13SC1-575	3.53	4.68	1.3	1.1	0.7	0.11	0.5	34.6	0.17	<1	<5	110	1890	<5	0.2	0.2	28.1	5.9	106	3.9	151	3.52	2.39	1.06	9.07	3.76	2	2	0.77	<0.2	18.4	26	0.38	192	3	3.2	17	69	8	4.36	53.7	1.3	9	8	3.7	2	172	<0.5
C-467012	13SC1-585	1.71	18	3.62	0.6	7.16	0.11	0.4	7.44	0.1	<1	9	66	3130	<5	0.1	<0.2	30.4	4.8	48	2.2	37	4.57	3.3	1.35	5.1	4.32	<1	<1	1.01	<0.2	23.4	14	0.62	2210	<2	3.8	18.7	38	5	4.79	30	0.8	14	<5	3.9	2	419	<0.5
C-467013	13SC1-635	1.56	19.4	3.87	0.49	6.35	0.09	0.4	8.06	0.09	<1	5	52	2630	<5	0.2	<0.2	21.4	5.9	53	1.7	67	3.73	2.78	1.06	4.29	3.62	<1	<1	0.84	<0.2	18.1	15	0.53	1890	<2	3.1	15.3	50	<5	3.74	23.8	0.9	8	8	3.2	7	439	<0.5
C-467014	13SC1-740	1.44	1.77	0.96	0.42	0.45	0.04	0.5	42.4	0.07	<1	<5	65	1730	<5	0.2	<0.2	15.7	4.4	61	1.2	49	2.87	2	0.75	4.83	2.81	1	1	0.61	<0.2	11.9	28	0.36	108	2	2.7	11.3	36	6	2.78	19.5	0.6	9	<5	2.4	<1	80.7	<0.5
C-467015	13SC1-838	2.49	5.09	1.54	0.75	0.89	0.08	0.6	33.5	0.14	<1	9	78	1640	<5	0.2	1	22.2	20	147	1.9	275	4	2.68	1.06	8.57	3.93	2	2	0.85	<0.2	17.1	25	0.44	230	5	4.5	17.6	110	11	4.28	32.8	1.6	10	6	3.6	<1	170	<0.5
C-467016	13SC1-842	1.88	7.52	1.07	0.57	1.03	0.05	0.3	32.8	0.1	<1	<5	58	1610	<5	0.3	0.4	20.6	5.5	59	1.6	75	3.55	2.47	0.89	5.2	3.61	1	1	0.79	<0.2	15.9	17	0.4	335	<2	3.3	15.1	34	<5	3.78	24.8	0.6	9	<5	3.2	<1	217	<0.5
C-467017	13SC1-1215	0.58	4.21	1.01	0.22	0.15	<0.01	0.8	39.1	0.03	<1	24	32	880	<5	0.1	10.5	6.4	1.8	79	0.5	57	1.73	1.23	0.44	1.94	1.54	<1	<1	0.39	<0.2	7	14	0.18	56	20	1.4	6.3	53	<5	1.54	8.5	17.5	<5	28	1.4	5	144	<0.5
C-467019	13SC1-1225	1.59	5.41	1.14	0.59	0.36	0.02	0.9	32.3	0.08	2	41	45	1130	<5	0.4	58.2	14.4	3.6	329	1.6	233	3.61	2.56	0.86	5.48	3.58	2	1	0.81	<0.2	17.4	19	0.42	90	47	2.4	15.7	146	7	3.79	25.2	41.6	8	58	3	2	167	<0.5
C-467020	13SC1-1228	2.45	10.9	1.45	0.89	0.55	0.02	1.4	24.6	0.14	1	36	69	1400	<5	0.5	40.1	23	3.7	285	2.6	191	5.16	3.97	1.05	8.61	4.55	2	2	1.18	<0.2	27.4	18	0.67	160	62	4.2	20.3	161	8	5.33	41.7	39	11	70	3.8	1	306	<0.5
C-467021	13SC1-1230	0.28	27.7	0.7	0.15	0.15	7.62	0.6	10.9	<0.01	<1	37	14	1260	<5	<0.1	5.6	22.6	1	35	0.4	20	20.6	14.2	3.77	1.37	18.8	<1	<1	4.69	<0.2	31.4	<10	1.79	154	10	1	44	47	<5	8.91	3.6	12.5	<5	29	11.6	<1	798	<0.5
C-467022	13SC1-1234	0.44	5.46	0.7	0.18	0.11	0.02	0.5	39	0.02	<1	20	27	919	<5	<0.1	13.3	4.5	1	70	0.5	63	1.76	1.41	0.43	1.44	1.69	<1	<1	0.43	<0.2	6	12	0.22	69	19	0.9	5.4	52	<5	1.26	6.3	21.2	<5	22	1.1	<1	160	<0.5
C-467023	13SC1-1238	2.17	12.2	0.96	0.83	0.55	0.05	1	23.2	0.12	2	24	55	1480	<5	0.4	44.1	20.9	3.4	197	2.3	219	6.01	4.74	1.18	6.41	5.25	1	1	1.42	<0.2	24.7	17	0.83	168	117	3.4	19.7	205	9	4.82	36	41.9	11	52	4.1	1	343	<0.5
C-467024	13SC1-1240	0.55	7.93	0.58	0.22	0.16	0.01	0.4	34.2	0.03	<1	16	29	775	<5	0.1	14.7	6.2	1.4	76	0.7	57	1.63	1.35	0.38	1.66	1.5	<1	<1	0.4	<0.2	7.5	14	0.23	76	24	1.3	5.9	60	<5	1.46	9.3	20.2	<5	17	1.2	<1	219	<0.5
C-467025	13SC1-1270	0.68	4.58	0.56	0.26	0.17	0.01	0.3	40.1	0.03	<1	19	26	960	<5	0.2	10.5	5.4	1.8	68	0.6	72	1.1	0.75	0.29	1.76	1.04	<1	<1	0.24	<0.2	4.5	19	0.11	67	35	1.1	4.1	78	5	1.01	9.3	13	<5	15	0.9	<1	142	<0.5
C-467026	13SC1-1276	0.6	6.47	0.56	0.24	0.16	0.02	0.5	36	0.03	<1	26	26	906	<5	0.2	22.5	6.6	1.5	75	0.6	96	2.03	1.38	0.48	2.01	2.04	1	<1	0.46	<0.2	7.6	14	0.21	83	38	1	7.6	81	<5	1.8	8.3	21.5	<5	25	1.6	1	183	<0.5
C-467027	13SC1-1315	2.45	7.81	1.68	0.88	0.51	0.02	1.2	27.1	0.13	2	62	67	1550	<5	0.4	23.1	23.1	5.3	191	2.6	248	3.68	2.6	0.86	7.72	3.49	1	2	0.84	<0.2	19.9	18	0.45	130	112	4	17	249	10	4.32	40.3	42.2	11	83	3.3	1	251	<0.5
C-467028	13SC1-1325	2.77	6.11	1.42	0.95	0.59	0.03	1	26	0.14	2	34	68	1460	<5	0.5	15.9	22.7	6.8	153	2.8	193	4.22	2.82	0.96	7.06	4.21	1	2	0.89	<0.2	17.3	18	0.46	129	177	4.2	16.5	267	11	4.05	43.3	40.6	11	39	3.5	1	227	<0.5
C-467030	13SC1-1328	0.57	4.42	0.4	0.24	0.13	<0.01	0.2	39.8	0.03	<1	14	26	795	<5	<0.1	13	4.7	1.7	63	0.5	59	0.88	0.61	0.3	1.78	0.87	<1	<1	0.19	<0.2	4	18	0.1	55	19	1.2	3.4	51	<5	0.89	8.1	11.8	<5	8	0.8	<1	143	<0.5
C-467031	13SC1-1350	0.48	6.11	0.42	0.18	0.13	<0.01	0.2	37.8	0.02	<1	8	29	734	<5	<0.1	9.9	3.7	1.1	62	0.4	50	0.81	0.55	0.23	1.79	0.8	<1	<1	0.18	<0.2	3.8	14	0.1	62	18	0.9	3.3	43	<5	0.83	5.7	8	<5	6	0.7	<1	195	<0.5
C-467032	13SC1-1355	0.72	15.5	0.48	0.28	0.27	0.01	0.5	26.2	0.04	<1	20	25	881	<5	0.1	5.3	8.3	1.9	39	0.6	54	1.7	1.31	0.46	2.34	1.66	<1	<1	0.41	<0.2	8.1	13	0.22	178	50	1.2	7.1	82	<5	1.64	10.5	7.2	<5	15	1.4	<1	416	<0.5
C-467033	13SC1-1760	3.65	1.01	1.5	1.26	0.67	0.05	0.2	39.4	0.19	<1	<5	103	1770	<5	0.2	1.1	37.9	8.5	93	3.9	57	4.24	2.52	1.14	9.79	4.57	2	2	0.85	<0.2	19.4	35	0.38	108	4	5.8	19.5	64	9	4.94	63.3	1.4	12	<5	4.1	1	75.1	<0.5
C-467034	13SC1-1942	3.43	1	1.74	1.23	0.79	0.04	0.5	39	0.19	<1	<5	99	1640	<5	0.2	0.2	33.3	6.4	104	3.8	94	3.55	2.13	0.96	9.46	3.66	2	2	0.73	<0.2	17.5	37	0.35	115	<2	5.6	17	50	10	4.4	60.3	0.9	12	<5	3.6	<1	68.3	<0.5
C-467035	13SC1-1950	3.44	0.88	2.24	1.11	0.88	0.04	0.4	38.7	0.19	<1	<5	89	1550	<5	0.1	<0.2	36.5	6.3	84	3.4	34	3.19	1.95	0.93	9.11	3.43	2	2	0.68	<0.2	19.4	39	0.32	115	<2	5.5	16.9	52	8	4.53	55.7	0.7	11	<5	3.6	<1	67.5	<0.5
C-467036	13SC1-1990	3.81	0.89	2.05	1.27	0.9	0.04	0.4	38.1	0.21	<1	8	103	1590	<5	0.1	<0.2	40.7	7	95	4.3	49	3.64	2.3	1.05	10.8	3.9	2	2	0.73	<0.2	22.3	36	0.35	120	<2	6.6	20	49	11	5.36	69.1	0.7	12	<5	4.1	2	79.2	0.6
C-467037	13SC1-2080	2.33	1.23	1.85	0.74	0.76	0.02	0.4	39.8	0.11	<1	<5	78	1060	<5	0.1	<0.2	16.5	3.5	66	2.2	30	2.16	1.44	0.56	5.94	2.06	1	1	0.47	<0.2	9.1	43	0.24	107	<2	3.7	8.8	30	7	2.28	36.9	0.4	9	<5	2	3	56.4	<0.5
C-467038	13SC1-2190	4.45	1.58	3.45	1.48	1.11	0.08	1.4	35.4	0.24	<1	13	113	1590	<5	0.2	0.6	45.5	19.3	133	4.8	126	5.84	3.54	1.48	11.9	6.25	2	3	1.2	<0.2	28.5	42	0.52	137	<2	7.5	28.5	131	19	7.23	77.7	2.5	13	13	5.9	1	95.4	0.7
Lab No.	Field No.	Al	Ca	Fe	K	Mg	P	S	Si	Ti	Ag	As	B	Ba	Be	Bi	Cd	Ce	Co	Cr	Cs	Cu	Dy	Er	Eu	Ga	Gd	Ge	Hf	Ho	In	La	Li	Lu	Mn	Mo	Nb	Nd	Ni	Pb	Pr	Rb	Sb	Sc	Se	Sm	Sn	Sr	Ta
		%	%	%	%	%	%	%	%	%	ppm	ppm	ppm	ppm	ppm	ppm	ppm	ppm	ppm	ppm	ppm	ppm	ppm	ppm	ppm	ppm	ppm	ppm	ppm	ppm	ppm	ppm	ppm	ppm	ppm	ppm	ppm	ppm	ppm	ppm	ppm	ppm	ppm	ppm	ppm	ppm	ppm	ppm	ppm
C-468454	SC1-1125	0.33	31.5	0.33	0.08	0.11	10.9	0.3	3.76	0.01	<1	22	12	1660	<5	0.1	3.3	80.3	3.9	29	0.2	21	66.6	38.8	15.6	2.38	73.1	<1	<1	14.1	<0.2	87.7	<10	3.7	71	13	0.6	186	78	<5	31.7	3.1	7.5	<5	23	51.3	4	1010	<0.5
C-468455	SC2-3	1.26	1.4	0.67	0.4	0.27	0.05	0.2	40.4	0.06	<1	<5	61	1580	<5	0.2	<0.2	20.1	11.5	33	1.1	29	3.83	2.29	1.09	4.13	4.37	1	1	0.73	<0.2	13.7	20	0.33	179	2	3.1	17.8	38	5	3.96	18	2.2	10	<5	4	5	65.8	1.3
C-468457	SC2-16	2.12	0.69	1.28	0.71	0.36	0.06	0.5	39.1	0.12	<1	<5	73	1550	<5	0.2	0.2	22.6	7.9	125	2.5	91	3.07	1.88	0.91	6.49	3.41	2	1	0.61	<0.2	13	26	0.29	162	2	3.3	14.8	55	7	3.4	37.3	0.8	9	<5	3.1	3	56.7	0.8
C-468458	SC2-16A	1.28	7.85	1.37	0.45	0.68	0.04	0.4	31.6	0.06	<1	<5	60	1610	<5	0.2	<0.2	11.3	6.9	80	1.2	63	2.24	1.49	0.73	4.16	2.45	1	<1	0.48	<0.2	9.2	18	0.2	763	2	2.5	10.2	38	<5	2.41	20.8	0.6	5	9	2.2	4	210	1.1
C-468459	SC2-17	2.62	0.61	1.74	0.82	0.47	0.05	0.5	38.8	0.14	<1	5	86	1490	<5	0.3	<0.2	25.6	9.2	103	3	75	3.24	2.06	0.97	7.2	3.61	2	1	0.62	<0.2	14.6	30	0.29	173	2	3.8	16.7	60	6	3.65	41.8	0.7	10	13	3.5	3	52.1	0.8
C-468460	SC2-22A	3.79	2.28	2.39	1.46	0.84	0.07	0.9	31.2	0.21	2	14	114	1650	<5	0.2	0.8	31	12.4	199	4.3	231	4.1	2.79	1.09	13.6	4.16	3	2	0.85	<0.2	22.2	31	0.48	140	3	5.9	20.7	108	22	4.99	76	1.8	10	20	4.2	3	108	0.6
C-468461	SC2-23	3.65	2.37	2.03	1.34	0.88	0.09	0.5	32.6	0.21	1	9	106	1680	<5	0.2	0.8	32.8	10.5	161	4	121	4.89	2.9	1.21	10.8	5.01	2	2	0.97	<0.2	22.3	29	0.46	125	2	6.2	23.3	86	14	5.53	67.4	1.2	10	16	4.8	3	107	0.8
C-468462	SC2-25	1.53	9.2	2.93	0.55	2.02	0.07	0.2	26.6	0.09	<1	<5	61	1220	<5	0.1	<0.2	25.4	4	34	1.7	26	5.94	4.01	1.28	4.62	5.45	1	1	1.22	<0.2	21.1	19	0.57	628	<2	2.7	21.8	17	<5	4.9	28.5	0.2	10	<5	5	2	211	0.6
C-468463	SC2-26	3.3	2.16	1.95	1.22	0.75	0.06	0.7	29.6	0.19	<1	13	97	1600	<5	0.2	0.9	27.3	13.4	191	3.5	154	3.43	2.45	0.96	10.6	3.68	2	2	0.68	<0.2	18.8	25	0.41	109	3	5.4	17.8	121	18	4.3	61.9	1.8	9	8	3.5	3	105	0.6
[truncated: 12 more columns]

## Sheet: Cape Lisburne ICP
Lab No.	Field No.	Al	Ca	Fe	K	Mg	P	S	Si	Ti	Ag	As	B	Ba	Be	Bi	Cd	Ce	Co	Cr	Cs	Cu	Dy	Er	Eu	Ga	Gd	Ge	Hf	Ho	In	La	Li	Lu	Mn	Mo	Nb	Nd	Ni	Pb	Pr	Rb	Sb	Sc	Se	Sm	Sn	Sr	Ta
		%	%	%	%	%	%	%	%	%	ppm	ppm	ppm	ppm	ppm	ppm	ppm	ppm	ppm	ppm	ppm	ppm	ppm	ppm	ppm	ppm	ppm	ppm	ppm	ppm	ppm	ppm	ppm	ppm	ppm	ppm	ppm	ppm	ppm	ppm	ppm	ppm	ppm	ppm	ppm	ppm	ppm	ppm	ppm
C-476457	16CL1-0.2	3.04	9.47	2.32	0.91	0.93	0.01	0.1	28.7	0.12	<1	<5	45	4160	<5	0.3	0.2	30.4	7.2	30	2.5	66	3.64	1.96	0.65	7.41	3.53	1	1	0.7	<0.2	18.5	26	0.28	2300	<2	3.1	17.2	68	15	4.43	39.1	0.4	11	<5	3.3	1	337	0.8
C-476458	16CL1-0.5	3.25	7.96	1.43	1.12	0.62	0.02	<0.1	33.5	0.14	<1	<5	63	2320	<5	0.3	<0.2	39.8	11.6	32	2.8	56	4.28	2.26	1	7.69	4.8	2	1	0.82	<0.2	24	12	0.33	1760	<2	3.4	24.7	72	11	6.11	47.7	1.4	13	<5	5.1	<1	237	0.7
C-476459	16CL1-1.65	0.84	12.5	0.68	0.31	0.41	0.01	<0.1	29.4	0.03	<1	<5	25	1140	<5	0.1	<0.2	18.6	1.9	18	0.6	25	4.09	2.01	0.77	2.35	3.73	1	<1	0.79	<0.2	12.9	<10	0.32	2270	<2	1.2	14.3	16	<5	3.28	11.4	0.1	<5	<5	3.4	<1	387	<0.5
C-476460	16CL1-2.65	1.48	16.3	1.01	0.46	0.51	0.02	<0.1	24.1	0.06	<1	<5	32	1360	<5	0.2	0.5	30.2	7.1	13	0.9	39	4.96	2.68	1.03	3.95	5	1	<1	0.97	<0.2	18.4	<10	0.37	3010	<2	1.6	19.2	65	<5	4.52	18	0.1	7	<5	4.4	<1	416	<0.5
C-476462	16CL1-3.2	0.89	11.9	0.9	0.31	0.6	<0.01	0.1	31.5	0.04	<1	<5	24	1840	<5	0.1	<0.2	15	5.5	28	0.7	34	2.49	1.41	0.61	2.64	2.65	<1	<1	0.51	<0.2	9.5	<10	0.17	1780	<2	1.3	11	31	<5	2.5	12.4	0.2	<5	<5	2.4	<1	335	<0.5
C-476463	16CL1-3.7	0.95	18.3	0.77	0.29	0.31	0.01	0.1	23.7	0.04	<1	5	21	1090	<5	0.2	0.5	20.7	5.7	33	0.7	33	4.59	2.68	1.03	2.99	4.49	<1	<1	0.95	<0.2	15.8	<10	0.38	1610	<2	1.1	16.9	47	<5	3.95	10.8	0.7	6	<5	3.8	<1	555	<0.5
C-476464	16CL1-4.6	4.5	7.77	1.82	1.4	0.76	0.02	0.1	31.1	0.17	<1	6	80	2880	<5	0.4	0.3	48.8	9	50	4.3	161	5.54	3.18	1.02	11.5	5.59	2	2	1.11	<0.2	28.7	18	0.48	1170	<2	4.4	27.2	139	13	6.79	65.6	0.8	15	<5	5.6	<1	291	<0.5
C-476465	16CL1-4.75	1.22	13.8	0.93	0.32	0.37	0.01	0.3	27.2	0.06	<1	<5	23	4910	<5	0.2	1	19.2	68	29	0.8	70	3.36	1.78	0.74	2.94	3.4	<1	<1	0.67	<0.2	12.5	<10	0.25	3420	<2	1.4	13.5	209	<5	3.12	12.9	0.4	5	<5	3	<1	475	<0.5
C-476466	16CL1-5.4	2.08	19.2	1.12	0.27	0.46	0.01	0.1	19.7	0.05	<1	8	15	1170	<5	0.2	0.6	32.7	4.5	38	0.8	109	5.36	2.74	1.27	3.01	5.47	<1	1	1.03	<0.2	15	<10	0.36	2660	<2	1.4	19.4	59	<5	4.19	12.1	1.3	6	<5	4.5	<1	714	<0.5
C-476467	16CL1-5.45	4	5.12	8.88	0.94	0.42	0.04	0.5	25.7	0.17	1	141	42	3050	<5	0.4	5	57.6	176	81	3.5	233	6.13	3.5	1.34	8.26	6.62	1	2	1.28	<0.2	29.5	12	0.5	2580	78	4	30.7	994	57	7.5	44.6	22.8	13	40	6.2	<1	251	<0.5
C-476468	16CL1-5.7	4.24	4.82	8.7	1.35	0.55	0.03	2.4	23.6	0.2	2	189	65	7180	<5	0.5	2.9	51.1	184	73	4.9	240	5.8	3.31	1.1	10.9	5.74	2	2	1.22	<0.2	37.8	17	0.55	3620	59	4.7	33.6	864	44	8.63	62.1	15.3	15	31	6.1	1	392	<0.5
C-476469	16CL1-6.0	3.46	9.06	2.18	1.02	0.72	0.01	<0.1	31.1	0.14	<1	<5	61	2540	<5	0.3	0.2	39.7	9.4	45	3.4	53	5	2.55	1.01	8.63	5.08	2	1	0.95	<0.2	25	25	0.37	2120	<2	3.3	26	151	10	6.43	49.6	0.5	12	<5	5.4	<1	313	<0.5
C-476471	16CL1-6.75	4.24	10.6	2.67	1.34	0.92	0.02	0.3	25.7	0.17	<1	<5	68	10600	<5	0.4	0.3	36.3	10.8	54	4.7	90	5.42	3.07	1.11	11.2	5.53	2	2	1.15	<0.2	27	28	0.55	3260	<2	4.1	25.9	177	21	6.43	65.1	0.2	13	<5	5	<1	421	<0.5
C-476473	16CL1-7.85	1.12	16.2	1.04	0.35	0.44	0.01	0.2	25.4	0.05	<1	<5	25	6700	<5	0.2	<0.2	27.2	5.3	34	1	61	7.92	3.97	1.68	3.38	7.71	1	<1	1.51	<0.2	17.7	<10	0.5	2050	<2	1.3	24.2	65	14	5.01	14.7	0.2	9	<5	6.6	<1	577	<0.5
C-476474	16CL1-8.4	1.26	12.3	1.54	0.32	0.61	0.02	<0.1	30.6	0.05	<1	<5	24	1540	<5	0.2	0.3	20.2	17.3	21	1	45	3.69	1.96	0.97	3.68	3.91	1	<1	0.76	<0.2	11.7	<10	0.25	1900	<2	2.3	13.1	123	8	3.13	14.1	0.7	<5	<5	3.1	<1	477	1.2
C-476475	16CL1-8.7	4.4	0.82	3.54	1.2	1.06	0.02	<0.1	37.3	0.17	<1	<5	70	2950	<5	0.4	0.5	43.1	38.9	60	4.7	81	3.25	2.03	0.63	12.1	3.1	2	2	0.69	<0.2	19.9	49	0.37	302	<2	4.7	18.9	307	9	4.97	62.6	1.2	11	<5	3.1	1	107	0.6
C-476476	16CL1-9.75	8.03	0.51	5.2	2.83	0.9	0.04	1.3	24.3	0.34	<1	13	179	59900	<5	0.7	49.3	70.9	290	125	10.2	108	15.6	8.55	2.03	24.3	13.2	2	4	3.13	<0.2	30	24	1.2	15100	4	7.5	33.3	750	38	7.85	126	0.9	36	6	9.2	2	1010	0.7
C-476477	16CL1-9.8	4.32	0.47	2.65	1.33	0.86	0.02	0.3	37.6	0.18	<1	<5	83	9900	<5	0.5	2.6	46.2	20.8	79	5.3	63	4.74	2.59	0.76	12.8	4.3	2	2	0.94	<0.2	19.4	29	0.5	812	<2	4.8	19	155	10	4.76	67.9	0.7	17	<5	4.2	<1	125	<0.5
C-476478	16CL1-10.75	4.17	0.82	3.01	1.46	0.49	0.03	0.4	37.8	0.19	1	25	96	4560	<5	0.5	<0.2	46.2	13.9	88	4.4	71	2.84	1.77	0.54	13.1	2.96	2	2	0.56	<0.2	20.7	<10	0.32	247	13	4.1	21.4	106	9	5.59	65.2	1.3	14	6	3.4	3	98	<0.5
C-476479	16CL1-10.8	1.06	2.21	0.69	0.37	0.24	<0.01	0.1	43.5	0.05	<1	<5	33	3780	<5	0.2	0.4	13.8	6.8	46	1	19	1.45	0.89	0.27	3.31	1.52	1	<1	0.3	<0.2	6.6	<10	0.15	396	<2	1.2	6.7	37	<5	1.59	14.9	0.3	6	<5	1.5	<1	197	<0.5
C-476480	16CL1-11.3	4.22	2.6	2.29	1.39	0.65	0.04	0.3	36.7	0.23	2	6	101	7200	<5	0.9	0.4	57.5	21.6	110	3.9	159	4.06	2.6	0.93	15.5	4.71	2	2	0.86	<0.2	27.9	23	0.52	569	3	4.3	28.2	146	14	7.35	59.9	1.7	19	6	4.8	2	221	<0.5
C-476481	16CL1-11.95	0.95	1.83	0.82	0.32	0.19	0.01	0.1	42.9	0.04	<1	<5	33	1640	<5	0.2	<0.2	15.8	12.1	37	1	38	1.68	0.91	0.4	3.07	1.88	1	<1	0.32	<0.2	7	<10	0.17	477	<2	0.9	7.6	48	5	1.82	13.6	0.3	8	<5	1.8	<1	98.3	<0.5
C-476482	16CL1-12.9	2.87	4.79	2.16	0.65	1.42	0.04	0.2	32.3	0.15	2	6	47	2140	<5	0.8	1.4	48.9	16	157	2.3	162	5.86	3.65	1.24	8.37	5.76	2	2	1.27	<0.2	24.6	21	0.78	288	3	3.1	25.7	165	9	6.13	29.9	1.4	21	15	5.5	<1	173	<0.5
C-476484	16CL1-13.0-B	4.12	0.61	4.08	0.84	0.27	0.05	0.5	33.1	0.23	8	12	56	2520	<5	0.8	2.3	72.2	53.8	323	3.1	333	15.9	8.75	3.73	10.4	17.3	3	3	3.06	<0.2	33	11	1.6	809	11	3.7	51.2	480	13	10.9	38.5	3.1	58	30	15.3	1	120	<0.5
C-476485	16CL1-13.0-O	3.05	0.19	8.26	0.74	0.18	0.03	0.6	32.6	0.24	15	51	48	2980	<5	0.6	1.2	41.1	27.2	229	2.3	137	6.12	3.56	0.93	8.05	5.4	2	2	1.25	<0.2	20.7	<10	0.6	153	164	2.9	23.9	256	67	5.85	30.8	23.6	27	49	4.4	<1	157	<0.5
C-476488	16CL1-13.05	1.31	1.3	0.9	0.43	0.27	0.02	0.1	42.9	0.07	<1	<5	35	1580	<5	0.3	0.6	14.4	4.8	124	1.2	68	1.83	1.2	0.4	4.31	2.11	1	1	0.39	<0.2	7.4	<10	0.2	189	3	1.3	8.8	60	<5	2.09	17.3	0.3	9	6	2	<1	68	<0.5
C-476489	16CL1-13.1	2.03	0.91	6.96	0.41	0.35	0.02	0.5	34.8	0.1	2	7	31	1660	<5	0.3	0.7	24.3	9	177	1.1	120	3.15	1.92	0.64	5.65	3.44	2	1	0.7	<0.2	12.4	14	0.36	144	5	1.4	14	127	6	3.4	17.8	1.4	12	51	3.1	<1	67.4	<0.5
C-476490	16CL1-13.85	0.79	11.7	0.68	0.25	0.2	0.02	0.2	32.1	0.04	<1	<5	22	1230	<5	0.2	0.6	21.8	3.1	80	0.6	47	5.01	2.98	1.02	2.66	4.96	1	<1	1.05	<0.2	13.2	<10	0.55	287	2	0.9	17.4	31	<5	3.78	10.2	0.4	12	7	4.3	<1	385	<0.5
C-476491	16CL1-13.95	0.58	9.85	1.35	0.16	0.14	0.01	0.3	33	0.03	<1	6	16	1050	<5	0.2	0.4	16.7	4.5	69	0.5	42	3.81	2.25	0.77	1.63	3.82	<1	<1	0.77	<0.2	9.4	<10	0.4	236	6	0.5	13.1	61	6	2.8	6.6	1.6	9	28	3.3	<1	330	<0.5
C-476493	16CL1-13.95-O	0.84	0.32	10.8	0.27	0.09	0.01	1.1	35.1	0.04	3	54	<10	1270	<5	0.3	0.6	15.6	8.5	86	0.8	76	3.06	1.76	0.61	2.62	2.94	1	<1	0.65	<0.2	8.6	<10	0.35	184	60	0.9	11.7	122	14	2.56	10	4.4	9	21	2.8	<1	151	<0.5
C-476494	16CL1-14	0.81	4.14	0.8	0.25	0.12	0.01	0.2	38	0.04	26	<5	24	1160	<5	0.3	1.1	15.2	4.8	210	0.8	99	2.38	1.38	0.37	2.69	2.41	1	<1	0.51	<0.2	8.8	<10	0.3	140	5	0.7	10	81	<5	2.26	10.1	0.5	8	13	2.2	<1	151	<0.5
C-476495	16CL1-14.65	0.47	5.85	0.69	0.17	0.23	<0.01	0.2	38.8	0.02	<1	<5	23	1210	<5	0.2	0.2	9.4	2.3	88	0.5	47	1.5	0.78	0.32	1.49	1.56	<1	<1	0.32	<0.2	4.9	<10	0.14	110	<2	0.6	5.9	27	<5	1.39	6.3	0.3	<5	8	1.3	5	209	<0.5
C-476496	16CL1-14.8	1.42	21.6	1.24	0.38	0.35	0.06	0.4	16.8	0.08	<1	15	27	2340	<5	0.4	1.1	41.7	9.4	112	1.3	108	8.42	5.34	1.64	3.88	8.25	<1	<1	1.85	<0.2	28.6	<10	0.97	1560	12	1.6	31.7	78	8	7.31	17	1.9	15	30	6.9	<1	500	<0.5
C-476497	16CL1-15.2	0.37	17.5	0.85	0.12	0.19	0.04	0.4	24.9	0.02	<1	<5	13	1040	<5	<0.1	<0.2	10.6	1.9	42	0.3	29	3.05	2.13	0.54	1.24	2.69	<1	<1	0.73	<0.2	9.7	<10	0.43	1260	7	1.6	10.1	25	<5	2.36	4	1.2	<5	20	2.4	<1	429	0.9
C-476498	16CL1-15.3	1.08	24.5	0.67	0.33	0.3	0.02	0.3	15	0.06	<1	<5	24	1580	<5	0.2	1.3	17.6	6.3	225	1	119	4.67	2.85	0.93	3.27	4.71	<1	1	0.99	<0.2	17.8	<10	0.54	1650	6	1.6	18.8	87	<5	4.32	13	1.2	11	18	4	<1	594	<0.5
C-476499	16CL1-16.3	1.89	2.59	0.89	0.73	1.11	0.03	0.1	37.1	0.1	1	5	50	2210	<5	0.4	1.1	21.4	14.3	204	2	167	4.53	2.69	0.76	6.79	3.95	2	2	0.91	<0.2	15.5	<10	0.52	222	3	2.8	16.6	132	6	4.23	28.6	0.8	15	18	3.5	<1	91.9	<0.5
C-476500	16CL1-16.5	4.13	0.25	5.46	1.52	0.39	0.05	0.5	31.6	0.27	6	35	101	3940	<5	1	0.4	62.1	7.2	329	4.7	169	6.94	3.85	1	15	6.15	2	4	1.36	0.3	36.3	<10	0.69	67	27	5.8	40.2	124	27	10.7	64.1	5.4	30	17	6.4	2	191	<0.5
C-476501	16CL1-17.2	0.4	8.6	0.41	0.14	0.11	0.01	0.2	34.6	0.02	1	<5	22	1170	<5	0.2	0.9	9.7	3.6	74	0.4	55	2.81	1.69	0.67	1.49	2.8	<1	<1	0.59	<0.2	8.1	<10	0.29	277	2	0.7	10.3	46	<5	2.3	5	0.1	6	16	2.4	<1	291	<0.5
C-476504	16CL1-17.3	0.63	22	0.71	0.21	0.27	0.03	0.3	18.8	0.04	1	12	17	1420	<5	0.3	0.8	25.8	5.9	78	0.5	98	8.31	4.64	1.59	2.22	7.57	<1	<1	1.69	<0.2	24.7	<10	0.82	1050	13	0.9	28.4	86	7	6.48	7.6	1.3	15	15	6.4	<1	623	<0.5
C-476505	16CL1-17.8	0.49	16.9	0.51	0.17	0.26	0.02	0.2	25	0.03	<1	<5	15	1170	<5	0.2	1.8	16.8	4.7	112	0.4	97	5.43	3.3	1.17	1.89	5.29	1	<1	1.11	<0.2	17.8	<10	0.53	717	5	0.5	20	103	<5	4.54	5.8	0.7	11	7	4.4	<1	465	<0.5
C-476506	16CL1-18.4	0.32	16.1	0.39	0.13	0.18	0.01	0.2	24.9	0.01	<1	<5	17	1570	<5	0.1	0.3	6.5	1	27	0.3	17	2.59	1.53	0.49	0.99	2.38	<1	<1	0.55	<0.2	8.3	<10	0.28	862	<2	0.4	9.5	9	<5	2.06	4.4	<0.1	<5	<5	1.9	<1	563	<0.5
C-476507	16CL1-18.55	1.45	24.4	0.9	0.56	0.74	0.03	0.3	12.9	0.09	7	5	33	2220	<5	0.5	1.4	23.4	7.5	117	1.3	116	6.41	3.8	1.2	4.15	6.4	1	1	1.41	<0.2	24.1	<10	0.71	1130	4	1.6	25.4	59	6	5.8	21.5	0.8	15	11	5.3	<1	651	<0.5
C-476508	16CL1-19.9	0.55	5.37	0.68	0.21	0.2	0.01	0.2	37.8	0.03	3	<5	21	1150	<5	0.1	<0.2	8.4	1.8	75	0.5	28	2.02	1.18	0.4	1.51	1.93	1	<1	0.38	<0.2	7.6	<10	0.19	174	<2	0.8	8.2	17	<5	1.85	7.9	0.2	<5	5	1.8	<1	215	<0.5
C-476509	16CL1-20.2	1.77	20.5	4.09	0.6	0.52	0.04	0.7	14.6	0.1	<1	35	28	1980	<5	0.4	1.7	38.4	13.9	182	1.6	126	9.6	5.66	2.01	6.27	8.88	1	2	2	<0.2	36	10	0.97	1270	9	2.3	35.9	106	13	8.09	26.1	2.7	17	68	8.1	<1	611	<0.5
C-476510	16CL1-20.75	2.37	13.7	1.84	1.05	0.49	0.04	0.4	23.1	0.14	2	22	59	2730	<5	0.5	2.9	27.8	11.5	391	2.8	166	5.19	3.02	0.94	7.84	4.91	2	2	1.07	<0.2	22	<10	0.52	468	10	2.9	21.6	121	9	5.1	42.6	3.1	13	26	4.6	<1	452	<0.5
C-476511	16CL1-20.9	2.74	13	2.42	1.16	0.58	0.04	0.5	22.6	0.15	4	36	64	2790	<5	0.6	3.4	33.8	13.9	375	2.9	223	5.52	3.53	0.94	8.33	5.74	2	2	1.1	<0.2	25.7	<10	0.62	544	19	2.9	24.2	138	13	5.9	46.8	4.3	17	37	5.1	<1	412	<0.5
C-476512	16CL1-21.4	1.4	22.6	1.13	0.63	0.34	0.04	0.4	16.1	0.07	<1	9	34	3000	<5	0.3	2.9	21.3	4.1	225	1.7	102	5.89	3.59	1.16	4.12	5.47	<1	1	1.21	<0.2	21.3	<10	0.6	706	5	1.6	21.8	52	<5	5.02	24.6	2	11	18	5	<1	740	<0.5
C-476513	16CL1-21.7	4.18	5.42	4.7	1.8	1.91	0.04	0.4	22.8	0.24	7	72	90	3710	<5	1	4.5	41.5	15.6	610	4.2	306	9.53	5.9	1.62	12.3	9.16	2	4	2	0.2	40.1	<10	0.98	587	27	5.6	37.6	203	15	9.15	73.6	21.6	24	69	8.1	5	210	<0.5
C-476515	16CL1-24.55	1.24	4.51	24.3	0.5	1.31	0.52	0.5	12.9	0.05	<1	36	<10	2030	<5	0.3	3	102	35	159	0.9	70	23.7	9.93	8	6.24	28.5	2	1	4.14	<0.2	57.9	<10	1.24	13100	8	1.1	76.6	189	20	15.6	20.1	5.4	21	26	23.8	<1	259	<0.5
C-476516	16CL1-27	7.64	0.94	3.65	2.63	1.11	0.05	<0.1	32.3	0.42	<1	10	96	2700	<5	0.3	0.8	56.4	20.8	92	7.1	43	4.64	2.61	1.04	17.7	4.93	2	5	0.9	<0.2	28.4	29	0.43	671	<2	10.8	26.4	67	20	6.85	106	4.2	15	<5	5.1	2	112	<0.5
C-476412	16CL3-2.9	5.04	14.9	1.96	1.36	0.6	0.04	0.4	18.6	0.22	<1	<5	84	16400	<5	0.6	0.9	54.7	9.2	146	5.5	97	9.94	4.92	3.43	12.9	10	2	2	1.95	<0.2	48.1	28	0.84	335	<2	4.9	48.4	51	23	12.3	69.7	1.1	24	<5	10.8	1	510	<0.5
C-476413	16CL3-4	8.39	0.37	3.04	3.13	1.03	0.07	0.3	29.4	0.39	<1	<5	165	12200	<5	1.2	0.6	103	19.9	255	10.8	164	8.32	4.43	2.56	26.3	7.78	3	4	1.64	<0.2	45.7	53	0.74	226	<2	9.4	40.8	103	30	11.7	158	1.8	36	<5	8.2	2	135	0.6
C-476414	16CL3-5	2.87	0.61	1.08	1	0.41	0.03	0.1	40	0.12	<1	<5	52	4240	<5	0.4	0.5	32	5.4	44	2.5	34	3.3	1.74	1.14	8.34	3.45	2	2	0.68	<0.2	13.5	20	0.3	98	<2	3	14.2	35	5	3.63	48.2	0.5	13	<5	3.4	<1	83	<0.5
C-476416	16CL3-8.5	0.63	17.2	0.6	0.21	0.37	0.02	0.3	23.6	0.05	<1	25	25	1870	<5	0.2	8.9	11.5	2.4	66	0.5	56	2.75	1.71	0.68	2.05	2.45	<1	1	0.63	<0.2	8.8	<10	0.28	32	31	1.1	8.8	75	<5	2.09	8	8.4	6	14	2.1	<1	679	<0.5
C-476417	16CL3-8.6	0.78	18.6	0.59	0.26	0.44	0.02	0.3	22.1	0.06	<1	35	28	2070	<5	0.2	9.1	13.4	2.6	91	0.7	51	3.24	1.92	0.78	2.2	2.81	<1	1	0.71	<0.2	10.6	<10	0.33	49	26	1.2	10.4	68	<5	2.45	9.8	8	7	13	2.6	<1	723	<0.5
C-476418	16CL3-9	0.81	16.4	0.58	0.27	0.28	0.02	0.3	24.4	0.05	<1	19	30	2790	<5	0.2	12.9	10.7	2.8	70	0.7	80	2.28	1.4	0.68	2.98	1.99	<1	<1	0.49	<0.2	9.6	<10	0.27	81	38	1.2	8.5	94	<5	2.1	11.1	9	6	<5	1.8	<1	639	<0.5
C-476419	16CL3-9.6	0.89	25.2	1.01	0.28	1.3	0.03	0.4	12.3	0.05	<1	12	34	2130	<5	0.3	2.2	14.5	5	20	0.7	55	2.09	1.16	0.58	2.97	2.03	<1	<1	0.45	<0.2	9.1	<10	0.2	217	29	1.4	8.5	59	<5	2.11	11.1	1.2	<5	<5	1.8	3	741	<0.5
C-476420	16CL3-10	0.29	24.9	0.34	0.08	0.31	<0.01	0.2	17.6	0.01	<1	<5	17	737	<5	<0.1	0.3	4.3	1.8	15	0.2	10	0.6	0.33	0.19	0.73	0.49	<1	<1	0.12	<0.2	2.7	<10	0.06	192	3	0.3	2.2	11	<5	0.6	2.6	<0.1	<5	6	0.5	<1	319	<0.5
C-476421	16CL3-11.45	4.01	0.61	2.34	1.5	0.56	0.05	0.2	37.7	0.24	2	8	88	2850	<5	0.3	1.6	41.5	25.8	475	3.7	198	5.29	2.92	1.23	10.9	4.87	3	3	1.11	<0.2	21.8	17	0.56	333	2	6.1	22.5	209	11	5.96	67.2	2.9	16	21	4.5	1	72.6	<0.5
C-476422	16CL3-12.5	6.94	0.25	5.08	2.81	0.83	0.07	0.3	30.5	0.4	5	19	139	3190	<5	0.5	1.7	67.3	23.5	637	8.1	241	8.12	5.1	1.54	20.3	6.62	5	5	1.77	<0.2	39.2	46	1.11	145	<2	10.4	34.4	285	20	9.58	131	7.7	26	36	6.4	1	133	0.6
C-476423	16CL3-13.2	8.33	0.85	2.74	3.35	1.24	0.07	0.1	32.3	0.5	1	7	176	3770	<5	0.8	0.7	95.1	16.7	309	9	215	7.76	4.33	1.64	23.4	7.55	3	6	1.68	<0.2	48.6	33	0.88	216	<2	13.8	41	110	31	11.6	159	2	26	<5	7.7	3	87.3	0.8
C-476424	16CL3-14.8	5.63	1.48	2.83	2.23	1.02	0.05	0.3	34.6	0.32	2	15	112	6350	<5	0.4	1.2	47.9	16.7	285	5.7	122	5.92	3.49	1.79	16.1	5.73	3	4	1.2	<0.2	30.1	21	0.68	189	6	8.2	27	126	14	7.25	105	2.6	17	11	5.7	1	112	<0.5
C-476425	16CL3-15	5.88	0.68	3.03	2.29	0.84	0.05	0.2	33	0.31	2	17	117	2790	<5	0.4	1.2	51.1	18.4	462	6.4	176	6.64	3.73	1.47	16.5	5.94	4	4	1.36	<0.2	32.3	28	0.67	114	11	8.7	30.1	197	18	8.2	111	4.1	18	24	6.1	1	87.1	<0.5
C-476427	16CL3-16	1.78	0.96	1.42	0.71	0.32	0.01	0.2	41.8	0.09	1	13	47	2220	<5	0.2	5.4	13.5	4.9	230	1.7	110	2.17	1.33	0.59	5.69	1.91	2	1	0.45	<0.2	10.9	17	0.23	59	25	2.6	9.1	103	10	2.39	35	4	6	29	1.9	<1	63	<0.5
C-476428	16CL3-17.25	6.05	0.69	4.19	2.49	1.1	0.04	0.3	30.7	0.34	3	24	117	2800	<5	0.6	2.6	53.9	20.2	445	7.3	186	6.98	4.12	1.45	18.9	6.68	4	5	1.49	<0.2	33.7	51	0.77	162	<2	11.3	31.1	212	20	8.35	124	5.6	17	18	6.8	2	71.7	1.7
C-476429	16CL3-17.5	6.08	0.81	3.59	2.53	1.12	0.05	0.3	33.1	0.34	2	7	119	3260	<5	0.6	1.2	58.7	31.4	365	7	283	6.94	4.23	1.41	18.9	6.25	3	4	1.51	<0.2	38.7	34	0.88	433	<2	10.2	32.3	203	23	9.03	125	2.6	18	12	6.2	1	88.3	1
C-476430	16CL3-18	2.72	24.7	0.98	0.98	1.35	0.05	0.4	10.8	0.15	<1	6	83	4890	<5	0.6	3.4	35.8	4.5	215	2.5	177	9.64	4.7	2.37	8	9.01	1	2	1.86	<0.2	36.2	15	0.84	292	8	3.7	38.1	72	9	9.22	39.1	2.9	22	18	9	1	756	0.6
C-476431	16CL3-18.55	2.07	4.75	2.18	0.77	1.21	0.02	1	33.8	0.11	<1	<5	41	41100	<5	0.2	<0.2	27.4	7.4	57	1.6	43	5.96	3.2	5.37	6.23	5.55	1	1	1.21	<0.2	16.6	13	0.46	288	<2	3.6	19.9	39	<5	4.69	36.1	0.4	8	7	5.2	<1	535	<0.5
C-476432	16CL3-18.55-M	7.25	2.06	3.18	3.07	1.45	0.06	0.2	27.9	0.42	2	14	152	3530	6	0.7	1.4	61.5	20	371	8.6	271	6.27	3.8	1.47	26.3	5.72	4	5	1.26	<0.2	42.3	71	0.7	196	<2	12.7	29.6	204	9	8.78	155	1.8	19	<5	5.7	2	101	0.9
C-476434	16CL3-18.85	5.47	2.72	2.69	1.8	1.02	0.05	0.3	32.2	0.32	1	18	80	5390	<5	0.6	2.1	57.5	22.4	167	4.5	199	6.5	3.83	1.68	15.4	6.07	2	4	1.43	<0.2	35	28	0.82	279	2	10.4	30.5	140	18	8.04	86.9	2.1	17	7	6.2	2	140	0.7
C-476435	16CL3-19.3	1.43	1.69	0.96	0.58	0.46	0.01	0.2	42.2	0.07	<1	<5	35	8700	<5	0.1	<0.2	12.3	4.2	46	1.2	20	1.56	0.73	1.21	4.46	1.61	1	1	0.3	<0.2	6.4	13	0.15	112	<2	2.4	6.5	34	<5	1.67	27.8	0.3	<5	<5	1.5	<1	160	<0.5
C-476436	16CL3-20	2.27	0.89	1.51	0.95	0.75	0.02	<0.1	41.4	0.12	<1	<5	42	4470	<5	0.3	<0.2	25	7.8	64	1.9	34	3	1.54	1.07	7.62	2.95	2	2	0.57	<0.2	11.6	21	0.28	140	<2	3.7	12.3	91	6	3.13	44.1	0.2	8	<5	3	<1	87.7	<0.5
C-476438	16CL3-20.3	8.62	0.9	3.3	3.6	1.59	0.08	0.2	28.6	0.51	<1	<5	149	4470	<5	1.6	1.6	99.4	37.9	303	9.4	199	11.8	5.77	2.52	28.4	10.8	3	5	2.25	<0.2	53.2	53	1.03	289	<2	16.2	45.5	181	38	12.4	179	2.2	29	<5	10.1	3	95	1
C-476439	16CL3-20.75	1.97	0.76	1.8	0.82	0.61	0.02	0.1	40.1	0.1	<1	<5	40	2990	<5	0.2	<0.2	23.4	6.9	64	1.8	30	2.6	1.18	0.83	6.33	2.53	2	1	0.49	<0.2	10.5	18	0.24	133	<2	3.3	11.6	44	<5	2.79	37.5	0.1	7	<5	2.6	<1	72.5	<0.5
C-476440	16CL3-21.64	1.76	0.92	1.21	0.72	0.54	0.12	<0.1	42.2	0.08	<1	<5	36	2570	<5	0.2	<0.2	25.7	4.3	55	1.6	23	5.84	2.36	1.61	5.37	6.2	2	1	1.07	<0.2	10.6	15	0.33	142	<2	2.4	16	30	<5	3.41	32.9	0.2	5	<5	5.5	<1	89.2	<0.5
C-476441	16CL3-21.68	1.74	0.7	1.35	0.69	0.55	0.01	<0.1	44.3	0.07	<1	<5	36	3650	<5	0.2	0.7	11.9	6.6	61	1.5	38	2.19	1.18	0.77	5.31	1.95	2	1	0.44	<0.2	6.5	22	0.23	188	<2	2.1	6.3	46	7	1.61	32.4	0.3	6	<5	1.7	<1	79.6	<0.5
C-476442	16CL3-21.7	9.41	0.51	4.86	4.2	1.56	0.07	0.3	28.7	0.5	<1	7	172	4260	6	1.1	0.7	103	36.6	138	12.9	431	8.82	4.94	2.11	31.2	8.62	4	5	1.84	<0.2	54.4	62	0.89	169	<2	14.5	48.1	205	41	13.4	206	3.6	28	7	8.6	3	91.4	0.8
C-476443	16CL3-22.2	7.12	0.35	5.4	2.49	0.7	0.08	0.7	28.5	0.35	2	90	108	3400	<5	0.8	2.4	68.5	25.7	158	7.5	237	12.6	6.18	2.51	18.1	12.4	3	4	2.48	<0.2	37.1	39	1.08	112	22	10.1	42.9	204	61	10.6	120	8.6	21	6	9.3	1	304	0.5
C-476517	16CL3-29.25	6.73	0.15	6.15	2.91	0.87	0.07	0.4	29	0.39	1	78	100	4140	<5	0.4	0.4	64.1	28.4	160	9.8	161	5.03	2.87	1.01	19.9	5.02	3	4	1	<0.2	38.4	36	0.52	122	12	12.2	31.4	114	87	8.82	141	38.3	20	9	5.6	3	181	<0.5
C-476444	16CL3-29.56	7.54	0.56	5.5	2.96	1.16	0.16	0.1	28.8	0.42	3	41	92	2170	6	0.5	8.2	80.3	51	255	8.7	294	15.2	6.94	3.5	21.3	15.8	4	5	2.96	<0.2	47.4	53	1.09	725	<2	12.9	57.1	207	76	13.3	142	13.7	17	31	15.4	3	131	0.7
C-476445	16CL3-29.6	4.53	2.01	16.4	1.89	2.85	0.21	0.1	19	0.27	<1	<5	36	1960	<5	0.2	4.8	65.9	30.8	54	5.3	90	14.6	7.57	2.85	14.5	13.3	3	3	2.92	<0.2	44.8	31	1.23	10600	<2	8.4	44.3	79	11	10.8	87.4	1.2	12	<5	11.6	1	116	<0.5
C-476446	16CL3-30.1	6.88	1.35	6.83	2.84	1.46	0.31	0.1	27.8	0.39	1	17	74	3220	5	0.4	7.4	68.3	55.5	118	7.7	185	13.7	6.57	2.9	21.9	12.7	3	4	2.66	<0.2	43.3	54	0.95	15600	<2	12.5	45.7	151	39	10.8	134	6.2	15	23	11.7	1	146	0.8
C-476447	16CL3-30.15	7.23	1.29	5.14	2.94	1.51	0.07	0.2	28.7	0.43	<1	<5	79	2920	<5	0.4	4.2	73.1	31.6	107	7.1	127	6.82	4.04	1.51	21.5	6.28	3	5	1.45	<0.2	45.4	44	0.73	6810	<2	14	35.1	126	28	9.77	134	2.8	14	6	6.3	2	105	0.8
C-476449	16CL3-30.2	7	1.38	6.99	2.89	1.49	0.32	0.1	28.2	0.4	<1	17	80	3220	6	0.5	7	70	52.6	119	7.3	191	13.7	6.73	3.15	20.9	13.1	3	5	2.73	<0.2	44.4	57	0.98	15900	<2	11.8	46.3	154	40	11.5	133	6.2	16	20	12.4	3	149	0.7
C-476450	16CL3-30.5	5.58	1.08	10.5	2.48	1.94	0.11	0.1	23.9	0.32	<1	<5	57	1880	<5	0.4	1.7	59.8	32.2	66	6.8	63	8.65	4.41	1.91	18.5	8.34	3	4	1.62	<0.2	37.6	38	0.69	16600	<2	10.5	34.4	75	14	8.87	116	1.2	12	<5	8.2	2	89	0.5
C-476451	16CL3-31.3	6.28	0.43	7.27	2.66	0.69	0.13	1.7	26.6	0.38	3	96	80	1780	6	0.4	<0.2	65.6	7.2	238	7.9	66	5.46	2.83	1.26	21.2	5.12	3	5	1.05	<0.2	38.6	48	0.47	93	<2	13.8	36.4	48	45	10.3	129	9.9	14	9	6.1	2	128	1.8
C-476452	16CL3-31.35	7.79	0.78	5.71	3.03	1.15	0.13	0.9	28.6	0.45	2	30	90	2090	5	0.4	0.9	62.7	8.5	96	6.1	112	5.67	3.18	1.29	22.7	5.43	3	5	1.18	<0.2	39.1	45	0.56	1020	<2	14.5	29.7	45	20	8.58	134	6	15	9	5.6	3	117	1.3
C-476453	16CL3-31.65	1.24	1.9	6.4	0.48	1.32	0.16	0.3	34.4	0.07	<1	<5	19	2370	<5	0.1	1.3	24.4	35.8	43	0.9	24	6.71	3.28	1.57	5.4	6.48	2	1	1.26	<0.2	18.5	15	0.43	12000	<2	2.5	20.9	179	8	4.82	20.9	3.9	<5	<5	5.4	<1	205	<0.5
C-476454	16CL3-31.85	6.75	0.55	6.41	3.05	1.54	0.05	0.1	27.2	0.38	<1	<5	84	1960	<5	0.4	2.8	62.9	25.7	90	8.2	52	6.63	3.74	1.29	23.9	5.67	3	4	1.34	<0.2	45.2	57	0.62	7880	<2	13.2	36.4	140	12	10.4	147	0.9	13	<5	6.6	3	77.4	1
[truncated: 12 more columns]

## Sheet: Table S2 Info
Table S2. ICP-OES-MS data
This Supplemental Material accompanies
Dumoulin, J.A., Whidden, K.J., Rouse, W.A., Lease, R.O., Boehlke, A., and O’Sullivan, P., 2022,
Biosiliceous, organic-rich, and phosphatic facies of Triassic strata of northwest Alaska: Transect across
a high-latitude, low-angle continental margin, in Aiello, I., Barron, J., and Ravelo, C., eds., Understanding
the Monterey Formation and Similar Biosiliceous Units across Space and Time: Geological Society of
America Special Paper 556, https://doi.org/10.1130/2022.2556(11).
